# Supplementary material for: A human monocytic NF-κB fluorescent reporter cell line for detection of microbial contaminants in biological samples
Source: PubMed Central journal article supplement (PMC5443541; doi:10.1371/journal.pone.0178220), 2017-05-24
Supplement: pone.0178220.s001.pdf [file pone.0178220.s001.pdf]

| <b>Nr.</b> | <b>Cell line</b>                                       | <b>PCR</b> | <b>Mycoalert</b> | <b>Reporter assay</b> |
|------------|--------------------------------------------------------|------------|------------------|-----------------------|
| 1          | Mouse tail cells                                       | -          | -                | -                     |
| 2          | Human Mesotheliom                                      | +          | +                | +                     |
| 3          | Human melanoma brain metastasis-derived cell line YDFR | -          | -                | -                     |
| 4          | LN229 glioblastoma                                     | +          | +                | +                     |
| 5          | Human ovarian cancer cells                             | -          | -                | -                     |
| 6          | COS-7 cell line                                        | +          | +                | +                     |
| 7          | Human skin fibroblasts                                 | -          | -                | -                     |
